# Supplementary material for: Speculations on the application of foliar 13 C discrimination to reveal groundwater dependency of vegetation and provide estimates of root depth and rates of groundwater use
Source: Copernicus journal article supplement (doi:10.5194/hess-22-4875-2018), 2018-09-18
Supplement: Supplementary file 1 [file hess-22-4875-2018-supplement.pdf]

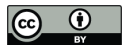

## *Supplement of*

# **Speculations on the application of foliar $^{13}\text{C}$ discrimination to reveal ground-water dependency of vegetation and provide estimates of root depth and rates of groundwater use**

**Rizwana Rumman et al.**

*Correspondence to:* Derek Eamus ([derek.eamus@uts.edu.au](mailto:derek.eamus@uts.edu.au))

The copyright of individual parts of the supplement might differ from the CC BY 4.0 License.

# Supplementary Material

**Table S1: List of species, their functional types,  $\Delta^{13}\text{C}$  and calculated intrinsic  $\text{WUE}_i$  (PFT; plant functional type codes: BIT= broad leaf tree, NIT= needle leaf tree and S=shrub)**

| Species                          | Site Code <sup>1</sup> | PFT | $\Delta^{13}\text{C}$ (‰) | Calculated $\text{WUE}_i$ |
|----------------------------------|------------------------|-----|---------------------------|---------------------------|
| <i>Acacia aneura</i>             | AMU                    | NIT | 19.71±0.21                | 78.67                     |
| <i>Acacia melanoxylon</i>        | WR                     | BIT | 22.46±0.46                | 49.00                     |
| <i>Acmena graveolens</i>         | CT                     | BIT | 21.96±0.31                | 54.37                     |
| <i>Alphitonia whitei</i>         | RC                     | BIT | 24.81±0.58                | 23.63                     |
| <i>Alstonia muelleriana</i>      | RC                     | BIT | 23.42±0.4                 | 38.58                     |
| <i>Alstonia scholaris</i>        | CT                     | BIT | 22.76±0.36                | 45.75                     |
| <i>Anopterus glandulosus</i>     | WR                     | S   | 25.58±0.44                | 15.34                     |
| <i>Argyrodendron peralatum</i>   | CT                     | BIT | 24.89±0.26                | 22.75                     |
| <i>Atherosperma moschatum</i>    | WR                     | BIT | 22.57±0.85                | 47.80                     |
| <i>Cardwellia sublimis</i>       | CT                     | BIT | 22.46±0.58                | 48.92                     |
| <i>Castanospermum australe</i>   | CT                     | BIT | 22.04±0.4                 | 53.48                     |
| <i>Ceratopetalum succirubrum</i> | RC                     | BIT | 26.52±0.13                | 5.21                      |
| <i>Corymbia terminalis</i>       | AMU                    | BIT | 19.89±0.29                | 76.65                     |
| <i>Cryptocarya mackinnoniana</i> | CT                     | BIT | 24.59±0.12                | 26.02                     |
| <i>Daphnandra repandula</i>      | RC                     | BIT | 23.69±0.57                | 35.69                     |
| <i>Doryphora aromatica</i>       | RC                     | BIT | 25.41±0.88                | 17.19                     |
| <i>Dysoxylum papuanum</i>        | CT                     | BIT | 20.83±0.44                | 66.59                     |
| <i>Elaeocarpus grandis</i>       | CT                     | BIT | 22.34±0.1                 | 50.30                     |
| <i>Endiandra leptodendron</i>    | CT                     | BIT | 26.86±0.6                 | 1.51                      |
| <i>Eucalyptus amplifolia</i>     | CP                     | BIT | 21.02±0.31                | 64.53                     |
| <i>Eucalyptus camaldulensis</i>  | AMU                    | BIT | 20.28±0.35                | 72.43                     |
| <i>Eucalyptus clelandii</i>      | GWW                    | BIT | 17.68±0.17                | 100.56                    |
| <i>Eucalyptus dumosa</i>         | CM                     | BIT | 19.01±0.42                | 86.15                     |
| <i>Eucalyptus fibrosa</i>        | CP                     | BIT | 23.24±0.32                | 40.57                     |

| Species                              | Site Code <sup>1</sup> | PFT | $\Delta^{13}\text{C}$ (‰) | Calculated WUE <sub>i</sub> |
|--------------------------------------|------------------------|-----|---------------------------|-----------------------------|
| <i>Eucalyptus miniata</i>            | LF                     | BIT | 21.86±0.07                | 55.39                       |
| <i>Eucalyptus moluccana</i>          | CP                     | BIT | 21.48±0.24                | 59.50                       |
| <i>Eucalyptus obliqua</i>            | WR                     | BIT | 22.01±0.73                | 53.79                       |
| <i>Eucalyptus salmonophloia</i>      | GWW                    | BIT | 18.88±0.09                | 87.56                       |
| <i>Eucalyptus salubris</i>           | GWW                    | BIT | 18.02±0.19                | 96.82                       |
| <i>Eucalyptus socialis</i>           | CM                     | BIT | 19.94±0.18                | 76.17                       |
| <i>Eucalyptus tereticornis</i>       | CP                     | BIT | 21.27±0.26                | 61.85                       |
| <i>Eucalyptus tetradonta</i>         | LF                     | BIT | 19.82±0.34                | 77.39                       |
| <i>Eucalyptus transcontinentalis</i> | GWW                    | BIT | 19.75±0.31                | 78.24                       |
| <i>Eucryphia lucida</i>              | WR                     | BIT | 22.07±0.06                | 53.16                       |
| <i>Ficus leptoclada</i>              | RC                     | BIT | 21.53±0.49                | 59.01                       |
| <i>Ficus variegata</i>               | CT                     | BIT | 21.85±0.29                | 55.60                       |
| <i>Flindersia bourjotiana</i>        | RC                     | BIT | 23.8±0.43                 | 34.54                       |
| <i>Gillbeea adenopetala</i>          | RC                     | BIT | 24.41±0.26                | 27.94                       |
| <i>Gillbeea whypallana</i>           | CT                     | BIT | 23.22±0.42                | 40.79                       |
| <i>Leptospermum lanigerum</i>        | WR                     | BIT | 21.61±0.39                | 58.15                       |
| <i>Litsea leefeana</i>               | RC                     | BIT | 23.9±0.48                 | 33.38                       |
| <i>Melaleuca squarrosa</i>           | WR                     | BIT | 21.94±0.25                | 54.60                       |
| <i>Myristica globosa</i>             | CT                     | BIT | 24.04±0.53                | 31.91                       |
| <i>Notelaea ligustrina</i>           | WR                     | BIT | 21.2±0.51                 | 62.52                       |
| <i>Nothofagus cunninghamii</i>       | WR                     | BIT | 21.06±0.59                | 64.02                       |
| <i>Phyllocladus aspleniifolius</i>   | WR                     | S   | 18.48±0.68                | 91.93                       |
| <i>Pittosporum bicolor</i>           | WR                     | BIT | 19.99±0.67                | 75.63                       |
| <i>Polyscias elegans</i>             | RC                     | BIT | 22.96±0.6                 | 43.60                       |
| <i>Pomaderris apetala</i>            | WR                     | S   | 23.55±0.44                | 37.21                       |
| <i>Prunus turneriana</i>             | RC                     | BIT | 25.83±0.74                | 12.59                       |
| <i>Rockinghamia angustifolia</i>     | CT                     | BIT | 22.69±0.35                | 46.49                       |
| <i>Synima cordierorum</i>            | CT                     | BIT | 22.8±0.39                 | 45.33                       |
| <i>Syzygium johnsonii</i>            | RC                     | BIT | 25.7±0.07                 | 13.99                       |

| Species                        | Site Code <sup>1</sup> | PFT | $\Delta^{13}\text{C}$ (‰) | Calculated WUE <sub>i</sub> |
|--------------------------------|------------------------|-----|---------------------------|-----------------------------|
| <i>Syzygium sayeri</i>         | CT                     | BIT | 23.01±0.46                | 43.04                       |
| <i>Tasmannia lanceolata</i>    | WR                     | S   | 21.8±0.26                 | 56.03                       |
| <i>Xanthophyllum octandrum</i> | CT                     | BIT | 22.64±0.6                 | 47.08                       |

6

7 <sup>1</sup> AMU = Alice Mulga; WR = Warra tall eucalypt; CT = Cape Tribulation; RC = Robson's Creek; GWW =  
8 Great Western Woodlands; CM = Calperum Mallee; LF = Litchfield forest; CP = Cumberland Plain.

9 **Table S2: List of climate variables used in climate analysis**

| WorldClim Code    | Variables                           |
|-------------------|-------------------------------------|
| BIO <sub>1</sub>  | Mean Annual Temperature             |
| BIO <sub>2</sub>  | Mean Diurnal Range                  |
| BIO <sub>3</sub>  | Isothermality                       |
| BIO <sub>4</sub>  | Temperature Seasonality             |
| BIO <sub>5</sub>  | Max Temperature of Warmest Month    |
| BIO <sub>6</sub>  | Min Temperature of Coldest Month    |
| BIO <sub>7</sub>  | Temperature Annual Range            |
| BIO <sub>8</sub>  | Mean Temperature of Wettest Quarter |
| BIO <sub>9</sub>  | Mean Temperature of Driest Quarter  |
| BIO <sub>10</sub> | Mean Temperature of Warmest Quarter |
| BIO <sub>11</sub> | Mean Temperature of Coldest Quarter |
| BIO <sub>12</sub> | Mean Annual Precipitation           |
| BIO <sub>13</sub> | Precipitation of Wettest Month      |
| BIO <sub>14</sub> | Precipitation of Driest Month       |
| BIO <sub>15</sub> | Precipitation Seasonality           |
| BIO <sub>16</sub> | Precipitation of Wettest Quarter    |
| BIO <sub>17</sub> | Precipitation of Driest Quarter     |
| BIO <sub>18</sub> | Precipitation of Warmest Quarter    |
| BIO <sub>19</sub> | Precipitation of Coldest Quarter    |

10

11

12

13

14

15

16

17 **Table S3: Relationships of leaf traits with Mean Annual Precipitation and Moisture Index**

| Traits <sup>1</sup>            | Correlated with ln MAP              |              |          |                                     |              |          | Correlated with MI                  |              |          |                                     |              |          |
|--------------------------------|-------------------------------------|--------------|----------|-------------------------------------|--------------|----------|-------------------------------------|--------------|----------|-------------------------------------|--------------|----------|
|                                | Dry-season                          |              |          | Wet-season                          |              |          | Dry-season                          |              |          | Wet-season                          |              |          |
|                                | <i>Adj</i><br><i>r</i> <sup>2</sup> | <i>slope</i> | <i>p</i> |
| A <sub>400</sub>               | <b>0.224</b>                        | +            | <0.0001  | NS                                  |              | > 0.05   | <b>0.071</b>                        | +            | < 0.05   | NS                                  |              | > 0.05   |
| ln E <sub>400</sub>            | <b>0.140</b>                        | +            | <0.001   | <b>0.142</b>                        | +            | < 0.01   | 0.04                                | +            | > 0.05   | NS                                  |              | > 0.05   |
| ln vpdL <sub>400</sub>         | <b>0.281</b>                        | -            | <0.0001  | NS                                  |              | > 0.05   | <b>0.119</b>                        | -            | <0.0001  | NS                                  |              | > 0.05   |
| sqrt g <sub>s400</sub>         | <b>0.414</b>                        | +            | <0.0001  | <b>0.119</b>                        | +            | < 0.01   | <b>0.142</b>                        | +            | <0.01    | NS                                  |              | > 0.05   |
| ln WUE <sub>i</sub>            | <b>0.481</b>                        | -            | <0.0001  | <b>0.420</b>                        | -            | <0.0001  | <b>0.206</b>                        | -            | <0.0001  | <b>0.357</b>                        | -            | <0.0001  |
| C <sub>i</sub> /C <sub>a</sub> | <b>0.332</b>                        | +            | <0.0001  | <b>0.337</b>                        | +            | <0.0001  | <b>0.192</b>                        | +            | <0.0001  | <b>0.380</b>                        | +            | <0.0001  |
| C <sub>i400</sub>              | <b>0.352</b>                        | +            | <0.0001  | <b>0.439</b>                        | +            | <0.0001  | <b>0.199</b>                        | +            | <0.0001  | <b>0.443</b>                        | +            | <0.0001  |
| LDMC                           | <b>0.349</b>                        | -            | <0.0001  | <b>0.331</b>                        | -            | <0.0001  | <b>0.277</b>                        | -            | <0.0001  | <b>0.366</b>                        | -            | <0.0001  |
| ln LMA                         | <b>0.569</b>                        | -            | <0.0001  | <b>0.534</b>                        | -            | <0.0001  | <b>0.412</b>                        | -            | <0.0001  | <b>0.504</b>                        | -            | <0.0001  |
| ln FMA                         | <b>0.532</b>                        | -            | <0.0001  | <b>0.516</b>                        | -            | <0.0001  | <b>0.369</b>                        | -            | <0.0001  | <b>0.452</b>                        | -            | <0.0001  |
| ln Leaf N <sub>mass</sub>      | <b>0.192</b>                        | +            | <0.001   | <b>0.264</b>                        | +            | <0.001   | NS                                  |              | > 0.05   | <b>0.302</b>                        | +            | <0.0001  |
| ln Leaf P <sub>mass</sub>      | <b>0.259</b>                        | +            | <0.0001  | NS                                  |              | > 0.05   | NS                                  |              | > 0.05   | NS                                  |              | > 0.05   |
| ln Ratio N/P                   | <b>0.102</b>                        | -            | <0.01    | <b>0.167</b>                        | +            | < 0.01   | NS                                  |              | > 0.05   | <b>0.09</b>                         | +            | < 0.05   |
| ln Leaf N <sub>area</sub>      | <b>0.178</b>                        | -            | <0.0001  | <b>0.269</b>                        | -            | <0.001   | <b>0.363</b>                        | -            | <0.0001  | <b>0.204</b>                        | -            | <0.01    |
| ln Leaf P <sub>area</sub>      | N/S                                 |              | > 0.05   | <b>0.399</b>                        | -            | <0.0001  | <b>0.228</b>                        | -            | <0.001   | <b>0.286</b>                        | -            | <0.0001  |
| A <sub>400</sub> ·N            | <b>0.403</b>                        | +            | <0.0001  | <b>0.162</b>                        | +            | <0.01    | <b>0.396</b>                        | +            | <0.0001  | NS                                  |              | > 0.05   |
| ln A <sub>400</sub> ·P         | <b>0.106</b>                        | +            | < 0.01   | <b>0.272</b>                        | +            | <0.001   | <b>0.334</b>                        | +            | <0.001   | <b>0.119</b>                        | +            | <0.01    |

NS = Non-significant

<sup>1</sup>E = transpiration rate; VPD = vapour pressure deficit; g<sub>s</sub> = stomatal conductance; WUE<sub>i</sub> = intrinsic water-use-efficiency; C<sub>i</sub>/C<sub>a</sub> = ratio of internal to external concentrations of CO<sub>2</sub>; LDMC = leaf dry matter content; LMA = leaf mass to area ratio; ; FMA = foliar mass per unit area; N<sub>mass</sub> = foliar N content expressed per unit dry weight; P<sub>mass</sub> = foliar P content per unit mass; N<sub>area</sub> = foliar N content expressed per unit leaf area; P<sub>area</sub> = foliar P content per unit leaf area;

**Table S4: Variation in  $\Delta^{13}\text{C}$  and  $\text{WUE}_i$  by biome**

Mean and s.e of wet and dry season  $\Delta^{13}\text{C}$  and  $\text{WUE}_i$ . Means followed by different letters across sites in each season are significantly different (Tukey HSD, confidence level of 0.05).

| Biome <sup>1</sup> | $\Delta^{13}\text{C}$ (‰) |             | $\text{WUE}_i$ (‰) |               |
|--------------------|---------------------------|-------------|--------------------|---------------|
|                    | Dry-season                | Wet-season  | Dry-season         | Wet-season    |
| SW                 | 19.75±0.49c               | 19.15±0.32a | 78.14±5.26a        | 84.60±4.30a   |
| STS                | 19.82±0.25c               | 20.15±0.40a | 77.35±2.74a        | 73.85±3.45a   |
| TW                 | 20.16±0.25c               | 20.18±0.28a | 73.84±4.10a        | 73.57±3.03a   |
| HTS                | 20.77±0.38b,c             | -           | 67.21±2.84a,b      | -             |
| TWF                | 21.54±0.55b,c             | 23.51±0.56b | 68.80±5.91a,b      | 37.68±6.12a,b |
| LTR                | 22.98±0.46a,b             | 23.02±0.39b | 43.25±4.93a,b      | 42.86±4.17a,b |
| UTR                | 24.05±0.76a               | 24.31±0.52b | 31.74±8.16a        | 29.04±5.62b   |

<sup>1</sup> SW = semi-arid woodland; STS = semi-arid tropical savanna; TW = tropical woodland; HTS = high rainfall tropical savanna; TWF = temperate wet forest; LTR = lowland tropical rainforest; UTS = upland tropical rainforest

## 63    **Brief site descriptions of the seven Supersites (8 nodes)**

### 64    **Calperum Mallee (CM)**

65    The Calperum Mallee SuperSite is in the mallee semi-arid ecosystem located approximately 25 km  
66    north of Renmark in South Australia. The landscape is an extensive plain with undulating mallee  
67    woodland and riverine vegetation that fringes the River Murray and its anabranches. The vegetation  
68    is dominated by upper storey Eucalypt trees of four species (*Eucalyptus dumosa*, *Eucalyptus*  
69    *incrassata*, *Eucalyptus oleosa* and *Eucalyptus socialis*) (Meyer *et al.*, 2015).

### 70    **Great Western Woodlands (GWW)**

71    The Great Western Woodlands located in south-west Western Australia is the largest remaining  
72    intact semi-arid temperate woodland in the world. The vegetation comprises a 16-million hectare  
73    mosaic of mallee, scrub–heath and woodland and is locally determined by edaphic factors and  
74    influenced by historic disturbances (Gosper *et al.*, 2013). Mean annual rainfall is ~250 mm with the  
75    highest-mean rainfall months in winter. *Eucalyptus salubris* constructs the dominant crown layer in  
76    association with other *Eucalyptus* species (*E. salmonophloia*, *E. longicornis* and *E. moderata*) (Gosper  
77    *et al.*, 2013).

### 78    **Alice Mulga (AMU)**

79    The semi-arid Alice Mulga SuperSite is located approximately 200 km north of Alice Springs, in the  
80    Northern Territory of Australia. The climate is characterized as having hot summers and warm  
81    winters. Mean annual rainfall is ~300 mm and is highly seasonal, mostly occurring in large rainfall  
82    events during summer. Vegetation is dominated by Mulga (*Acacia aneura* and related species)  
83    woodlands, occasionally with large areas of spinifex under sparse woodland of *Corymbia* and other  
84    *Acacia* species (Cleverly *et al.*, 2016).

### 85    **Cumberland Plain (CP)**

86    The Cumberland Plain is a sclerophyll *Eucalyptus* woodland west of Richmond in New South Wales.  
87    The soil is characterized by nutrient-poor alluvium from sandstone and shale bedrock in the Blue  
88    Mountains deposited by the Nepean River. Despite being nutrient poor, this SuperSite supports high  
89    regional biodiversity and endemic biota and is dominated by *Eucalyptus fibrosa*, *E. moluccana* and *E.*  
90    *tereticornis* in the overstorey. Mean annual precipitation of this site is 900 mm (Table 1).



## **Warra Tall Eucalypt (WR)**

The Warra Tall Eucalypt SuperSite is a cool, wet temperate forest located in Tasmania. Vegetation is dominated by tall *Eucalyptus obliqua* occurring in a full range of successional stages from young regrowth forests to old-growth mixed forests (Hickey *et al.*, 1999). Mean annual temperature at this site is the lowest (~10°C), with a mean annual precipitation of 1474 mm (Table 1).

## **Litchfield Savanna Forest (LF)**

The Litchfield Savanna SuperSite is a ~1.5 km<sup>2</sup> tropical savanna 70 km south of Darwin in northern Australia. This site is representative of the dominant ecosystem of that region. Climate of this site is typical of northern Australia with extremely seasonal and high rainfall and approximately 56% of this site is burnt annually (Murphy *et al.*, 2010). However, in this study, data collected from Howard Springs (approximately 65 km north of Litchfield SuperSite; (Cernusak *et al.*, 2011) have been used as a representative of this particular SuperSite. This approach is justified because both of these sites had very similar vegetation and climate conditions as well as frequency of occurrence of fire. The stand structure in these two sites are sufficiently similar as to not shift physiological properties at the leaf-scale given the species occurred in both sites largely overlap (Bowman *et al.*, 2001; Hutley and Beringer, 2010; Murphy *et al.*, 2010).

## **FNQ Rainforest (RC and CT)**

The Far North Queensland Rainforest SuperSite is located in a tropical wet forest ~140 km north of Cairns in Far North Queensland. This SuperSite is structurally divided into two transects – a) the lowland rainforest based in the Daintree rainforest near Cape Tribulation (CT; MAT = 25.2 °C, Ozflux site average MAP = 5700 mm) and b) the upland rainforest based around Robson Creek (RC; MAT = 21 °C, MAP = 2140 mm). Precipitation is highly seasonal with most occurring during summer (Weerasinghe *et al.*, 2014). FNQ supports 10% of Australian flora despite of occurring in only 0.2% its landmass. Consequently a substantial number of the species in this study comes from this SuperSite. Data from two nodes of this SuperSite, i.e., Cape Tribulation and Robson Creek were collected and analysed independently in this study because of significantly different environmental clines (altitude, MAT and MAP) that exists in these two nodes of the Far North Queensland sites.

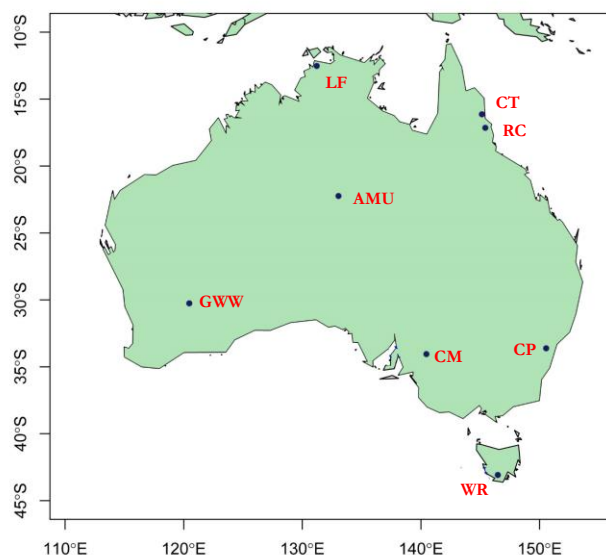

**Figure S1: Location of SuperSites (represented by black dots).**

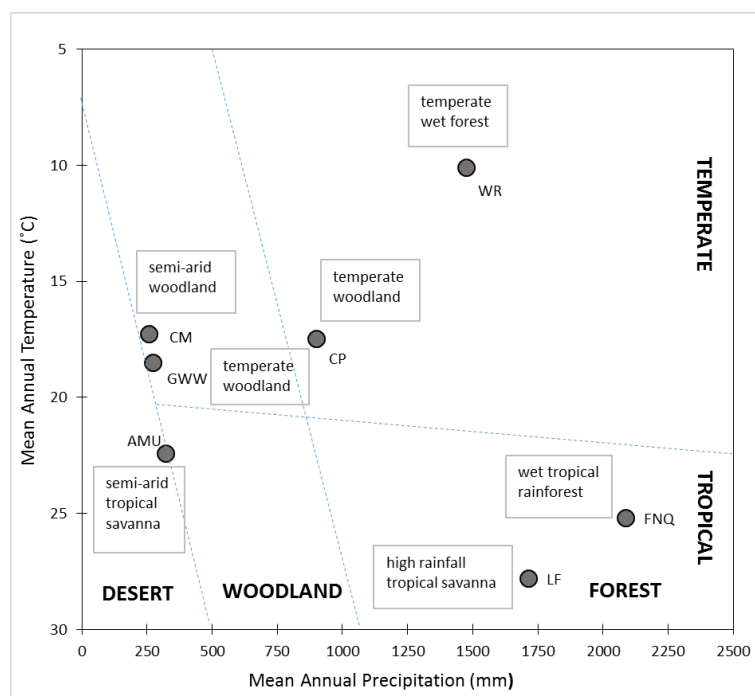

**Figure S2: Mean annual temperature, mean annual precipitation, and biomes of the study sites.**  
Each SuperSite is plotted in the Whittaker Biome Diagram (Whittaker, 1975) using the MAT and MAP observations generated for each site from the WorldClim data.

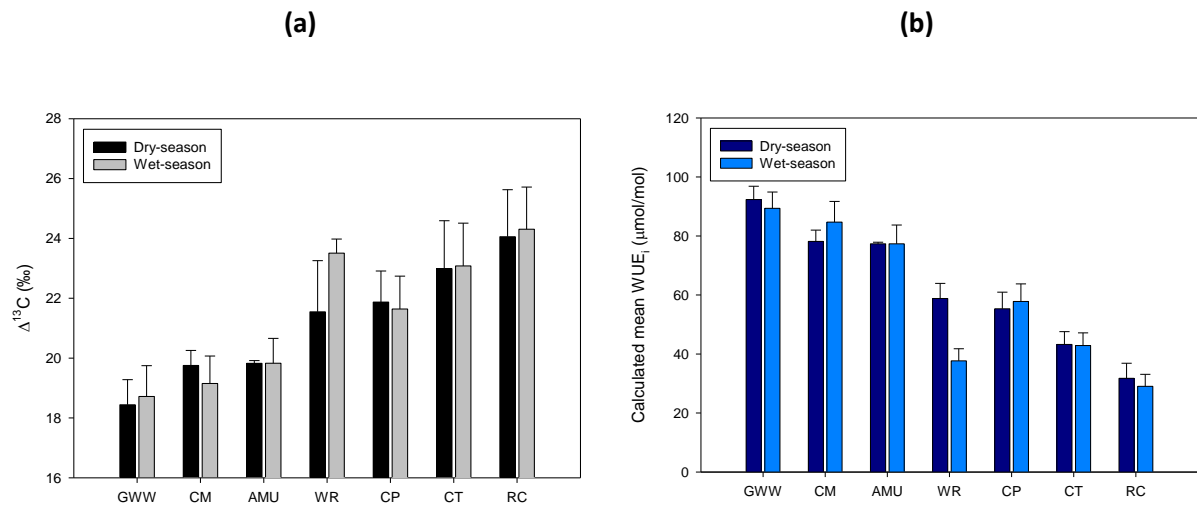

**Figure S3: Site mean values of (a)  $\Delta^{13}\text{C}$  and (b)  $\text{WUE}_i$**   
 Dark and light bars represent mean of dry and wet-season respectively and the error bars represent standard errors.

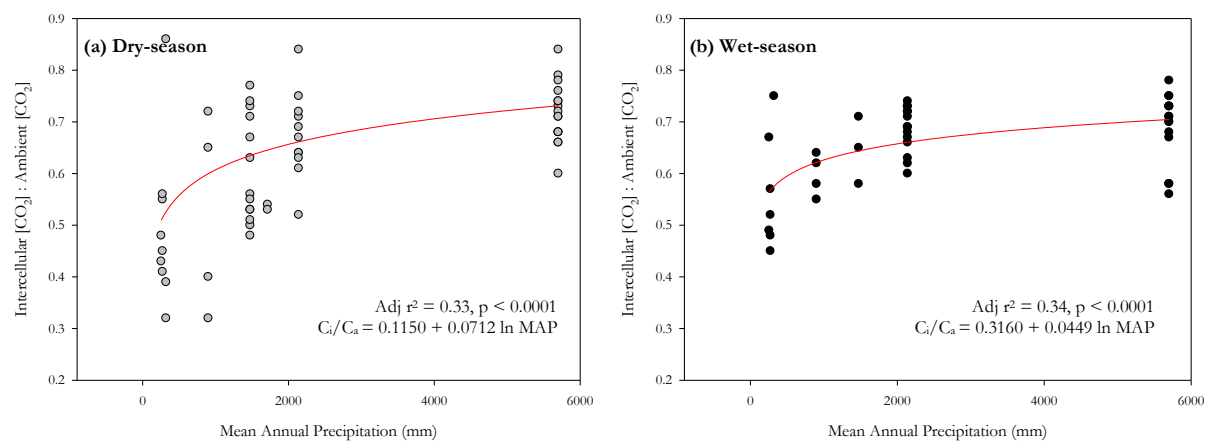

**Figure S4: Ratio between intercellular and ambient  $[\text{CO}_2]$  ( $C_i/C_a$ ) for both seasons plotted as functions of mean annual precipitation (MAP).**

Left and right panels are plotted from dry- and wet-season data respectively. Statistically significant correlations with MAP are plotted with red regression lines.

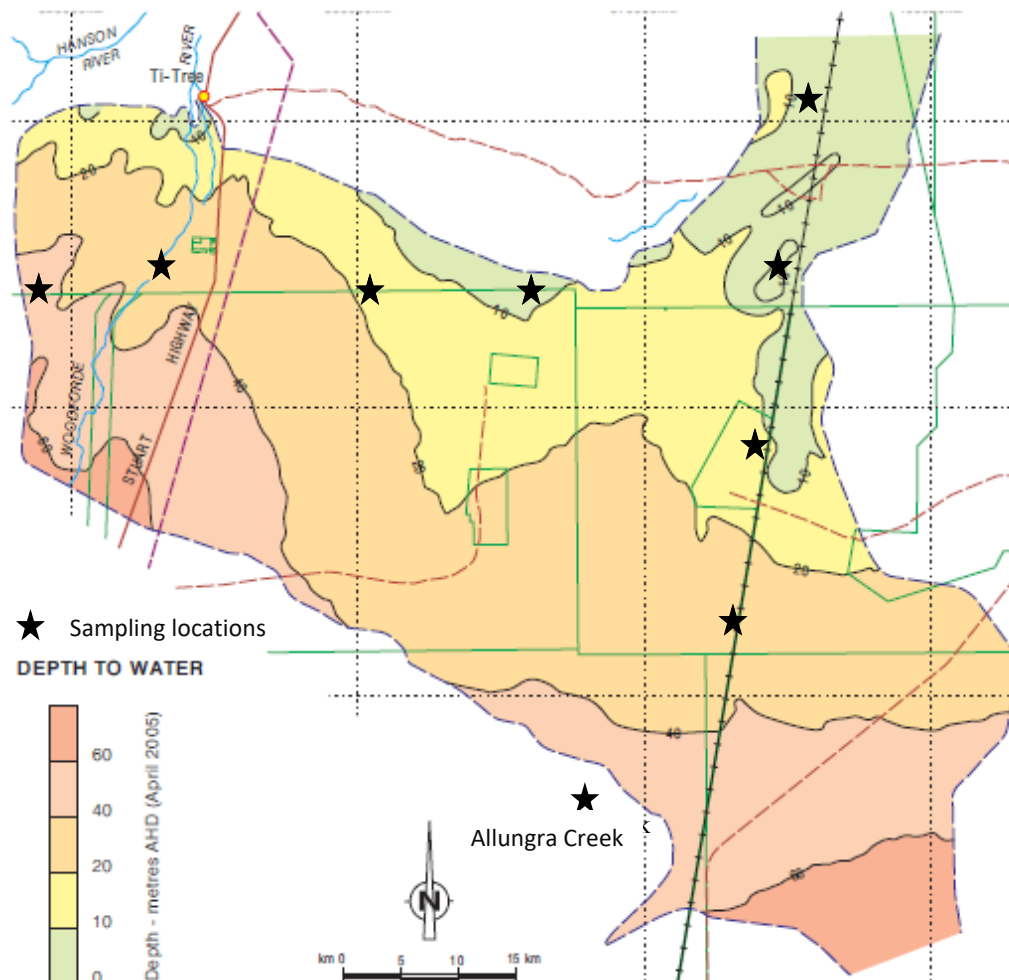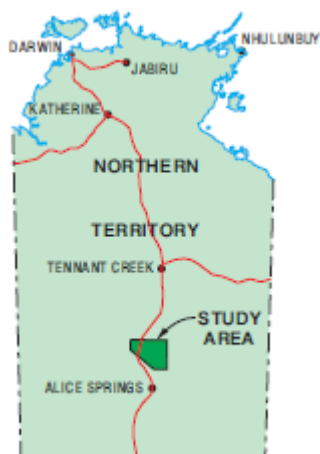

**Figure S5:** Map of the Northern Territory (NT) of Australia and the study area within the NT and the Ti Tree basin. Green lines represent property boundaries. AHD = Australian Height Datum
